# Supplementary material
Source: publisher figshare collection journal article supplement (https://sage.figshare.com/ndownloader/files/13086026)
Supplement: Supplementary file 1 [file 13086026]

## Appendix

### *Study 1 Vignettes*

Jane's alarm failed to go off one morning and she got up late. In order to make it to work on time, she sped through traffic. While speeding, she hit a puddle of water, lost control, and hit a person crossing the street and paralyzed him.

Stephen, a teenager, started hanging out with a group of guys that liked to cause trouble. One evening, the group decided to go to the school and vandalize it. Stephen didn't plan on helping them do this, but they gave him gasoline and a match and told him to burn down the gymnasium. Before he knew it, Stephen had lit the fire and it had spread to the entire school. The school was completely destroyed.

Ray, a construction worker, was supposed to use high quality bricks to make sure the home he was building was extremely strong, but because his company ran out of money and was about to go bankrupt, he used cheaper quality, less sturdy bricks. About 3 months after being built, the home collapsed severely injuring the people inside.

Laura lost her job and was unable to pay her rent. She was about to be evicted from her apartment and have nowhere to live. Laura was desperate, and went to a convenience store and robbed the place so she could pay her rent.

Sue, a college student, was supposed to watch her little cousin while he rollerbladed to make sure he didn't go too close to the street. Her phone rang and she talked to her best friend for 20 minutes without looking at what her cousin was doing. Her little cousin skated into the street and got hit by a car breaking his leg.

A security guard at a bank was on duty at night. While working, he accidentally fell asleep. The bank was robbed and the thieves got away without being caught.

### *Study 2 Vignettes*

Tom's brain got damaged in a car accident. He hasn't been able to control his anger ever since. He had a quarrel with someone. He hit the guy, making his nose bleed and knocking out three teeth.

James is a pilot in the army. During wartime, his commanding officer ordered him to drop bombs on the enemy's village. James did so. Three children died.

Joey is an accountant for a company. At the end of the year, his manager asked him to fake the statistics to make the company look good, otherwise he would be fired. Joey faked the statistics. Investors' interests were harmed.

Bruce works for the government. A criminal kidnapped his wife and daughter and asked him to turn over top-secret information. Bruce did so. National security was compromised.

William has cancer. Since he was in great pain and there seemed to be no chance for him to recover, he asked for euthanasia but was refused by the doctor. He tried to commit suicide by using gas in his hospital room. Eventually the patient next door died, but William survived.

Jim is a schizophrenia patient. During a schizophrenic episode he wielded a knife. He killed two women. Families of the victims were in great pain.

Leo is 8 years old. His family is very poor. He enjoys looking at food in the store. Once, he stole a box of chocolate. The store's employee was fired because of the poor security.

### *Study 3 Vignettes*

#### *Vignettes*

##### High Free Will, High Consequences

Jane got up late one morning. In order to make it to work on time, she chose to speed through traffic swerving around all the cars in front of her, which caused the other cars to slam on their breaks. Suddenly, she hit a puddle of water, lost control, and hit a person crossing the street and killed him.

Stephen started hanging out with a group of guys that liked to cause trouble. One evening, the group decided to go to the school and vandalize it. Once Stephen saw his friends doing it, he decided to participate too. He grabbed some gasoline and a match and before he knew it, Stephen had lit the fire. The school was completely destroyed and then the fire spread to many of the neighboring houses killing a family of 4 while they slept.

Ray, a construction manager, was supposed to use high quality bricks to make sure the home he was building was extremely strong, but because his company wanted to make more money, he chose to use cheaper quality, less sturdy bricks. About 3 months after being built, the home collapsed killing the family that had just moved in.

##### High Free Will, Low Consequences

Jane got up late one morning. In order to make it to work on time, she chose to speed through traffic swerving around all the cars in front of her, which caused the other cars to slam on their breaks. Her reckless driving caused various traffic problems and endangered the other drivers.

Stephen started hanging out with a group of guys that liked to cause trouble. One evening, the group decided to go to the school and vandalize it. Once Stephen saw his friends doing it, he decided to participate too. He grabbed some gasoline and a match and before he knew it, Stephen had lit the fire. The school was damaged.

Ray, a construction manager, was supposed to use high quality bricks to make sure the home he was building was extremely strong, but because his company wanted to make more money, he

chose to use cheaper quality, less sturdy bricks. As a result, the building was extremely dangerous to live in because it could collapse any time.

#### Low Free Will, High Consequences

Jane was driving and was distracted by a billboard's flashing lights. Suddenly, she saw that she was about to hit a car in front of her. She swerved to avoid the car, which caused other cars to slam on their breaks. Suddenly, she hit a puddle of water, lost control, and hit a person crossing the street and killed him.

Stephen started hanging out with a group of guys that liked to cause trouble. One evening, the group decided to go to the school and vandalize it. Stephen didn't plan on helping them do this, but they gave him gasoline and a match and told him to burn down the gymnasium or they would set him on fire instead. The school was completely destroyed and then the fire spread to many of the neighboring houses killing a family of 4 while they slept.

Ray, a construction manager, was supposed to use high quality bricks to make sure the home he was building was extremely strong, but because his company ran out of money and was about to go bankrupt and wouldn't be able to pay its employees, he was forced to use cheaper quality, less sturdy bricks. About 3 months after being built, the home collapsed killing the family that had just moved in.

#### Low Free Will, Low Consequences

Jane was driving and was distracted by a billboard's flashing lights. Suddenly, she saw that she was about to hit a car in front of her. She swerved to avoid the car, which caused other cars to slam on their breaks. As a result, there were various traffic problems and the other drivers were endangered

Stephen started hanging out with a group of guys that liked to cause trouble. One evening, the group decided to go to the school and vandalize it. Stephen didn't plan on helping them do this, but they gave him gasoline and a match and told him to burn down the gymnasium or they would set him on fire instead. As a result, the school was damaged.

Ray, a construction manager, was supposed to use high quality bricks to make sure the home he was building was extremely strong, but because his company ran out of money and was about to go bankrupt and wouldn't be able to pay its employees, he was forced to use cheaper quality, less sturdy bricks. As a result, the building was extremely dangerous to live in because it could collapse any time.
